# Supplementary material for: Adequacy of Disease Control by Supraomohyoid Neck Dissection in cT1/T2 Tongue Cancer
Source: MDPI journal article supplement (doi:10.3390/jpm12091535), 2022-09-19
Supplement: s1 [file s1]

**Supplementary Table S1.** Patients' characteristics ( $n= 565$ ).

| Characteristics  |         | No. of patients [ $n(\%)$ ] |
|------------------|---------|-----------------------------|
| Age              | Mean    | 49.73                       |
| Sex              | Male    | 485 (85.8)                  |
|                  | Female  | 80 (14.2)                   |
| Alcohol drinking | Yes     | 375 (66.4)                  |
|                  | No      | 190 (33.6)                  |
| Smoking          | Yes     | 408 (72.2)                  |
|                  | No      | 150 (26.5)                  |
|                  | Missing | 7 (1.2)                     |
| Betel            | Yes     | 394 (69.7)                  |
|                  | No      | 171 (30.3)                  |

**Supplementary Table S2.** Lymph node level involved in patients received modified radical neck dissection (mRND).

| Level           | pN+ patients |
|-----------------|--------------|
| I               | 107 (58.1%)  |
| II              | 101 (55.9%)  |
| III             | 49 (26.6%)   |
| IV              | 6 (9.3%)*    |
| V               | 1 (1.5%)*    |
| Skip metastasis | 0%           |

\*Calculated only in mRND group
